# Supplementary material for: Relationships between barley consumption and gut microbiome characteristics in a healthy Japanese population: a cross-sectional study
Source: bioRxiv or medRxiv preprint supplement (doi:10.1101/2021.09.13.21263482), 2021-09-15
Supplement: Supplementary file [file media-1.pdf]

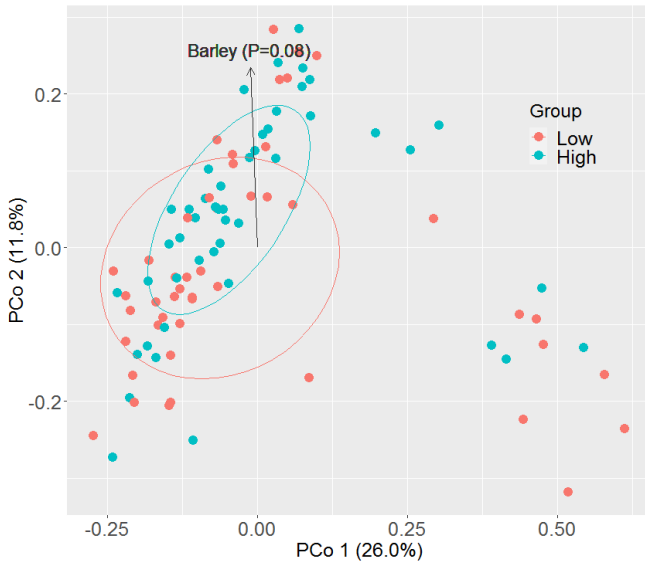

**Supplemental Figure 1** PCoA result. Color means high or low consumption of barley. The arrow means high barley group ( $n$  94, aged 19-65 years, Japan, 2018).

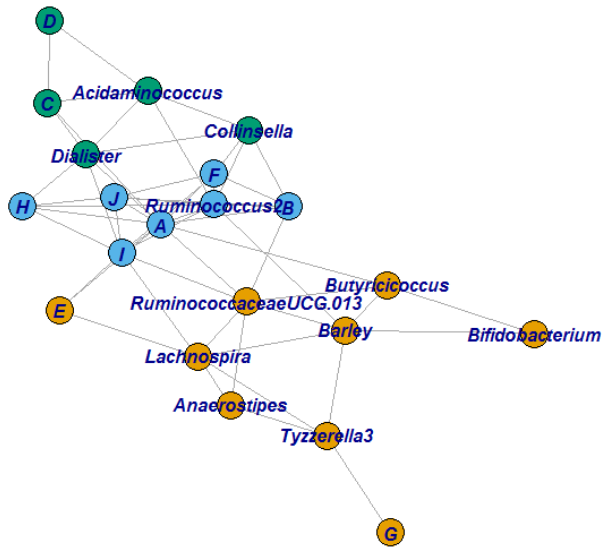

**Supplemental Figure 2** The result of network analysis. Line means correlation  $|r| > 0.15$  (Kendall rank-sum tests). Colors mean community groups. Described names are those in which the difference between low barley and high barley is  $P < 0.1$  (Mann-Whitney  $U$ -test) ( $n = 94$ , aged 19-65 years, Japan, 2018).

The bacteria described as characters are as follow; A: *Subdoligranulum*, B: *Eubacterium Hallii* group, C: *Prevotella2*, D: *Megaspheara*, E: *Roseburia*, F: *Veillonella*, G: *Lachnospiraceae* family uncultured, H: *Dorea*, I: *Ruminococcus1*, J: *Eubacterium coprostanoligenes* group.

**Supplemental Table 1** Criterion of risk group of diabetes, hypertension, and dislipidemia.

| Variable                 | <i>n</i> (Male) | Low barley<br>( <i>n</i> 119) | High barley<br>( <i>n</i> 117) | Criterion                                                                                                   |
|--------------------------|-----------------|-------------------------------|--------------------------------|-------------------------------------------------------------------------------------------------------------|
| <b>Diabetes risk</b>     |                 |                               |                                |                                                                                                             |
| Risk 2                   | 8 (8)           | 3                             | 5                              | HbA1c $\geq$ 6.5% or Fasting blood glucose $\geq$ 126 mg/dL or Under medication                             |
| Risk 1                   | 5 (5)           | 4                             | 1                              | Who were not Risk 2, and Fasting blood glucose $\geq$ 110 mg/dL                                             |
| Risk 0                   | 223 (161)       | 110                           | 113                            | Who were neither Risk 1 nor Risk 2                                                                          |
| <b>Hypertension risk</b> |                 |                               |                                |                                                                                                             |
| Risk 2                   | 46 (43)         | 20                            | 26                             | SBP $\geq$ 140 mmHg or DBP $\geq$ 90 mmHg or Under medication                                               |
| Risk 1                   | 20 (16)         | 11                            | 9                              | Who were not Risk 2, and either SBP $\geq$ 130 mgHg or DBP $\geq$ 85 mgHg                                   |
| Risk 0                   | 170 (115)       | 86                            | 84                             | Who were neither Risk 1 nor Risk 2                                                                          |
| <b>Dislipidemia risk</b> |                 |                               |                                |                                                                                                             |
| Risk 2                   | 97 (84)         | 46                            | 51                             | TG $\geq$ 150 mg/dL or HDL-cholesterol $<$ 40 mg/dL or LDL-cholesterol $\geq$ 140 mg/dL or Under medication |
| Risk 1                   | 31 (25)         | 17                            | 14                             | Who were not Risk 2, and LDL-cholesterol $\geq$ 120 mg/dL                                                   |
| Risk 0                   | 108 (65)        | 54                            | 54                             | Who were neither Risk 1 nor Risk 2                                                                          |

Risk 2 means disease, Risk 1 means border line, and Risk 0 means healthy participants.

Range of barley consumption; Low barley: 0-31.8 g/1000 kcal·day, High barley: 32.3-253 g/1000 kcal·day

**Supplemental Table 2** Alpha-diversity, compared low barley with high barley group on cross-sectional study (aged 19-65 years in 2018, Japan).

| Variable | Low barley ( <i>n</i> 47)                                     | High barley ( <i>n</i> 47)                                      | <i>P</i> value <sup>1)</sup> | <i>P</i> <sub>FDR</sub> value <sup>2)</sup> |
|----------|---------------------------------------------------------------|-----------------------------------------------------------------|------------------------------|---------------------------------------------|
|          | range: 0-31.8 g/1000 kcal·d<br>Median [ Interquartile range ] | range: 32.3-253 g/1000 kcal·d<br>Median [ Interquartile range ] |                              |                                             |
| Observed | 561 [ 482, 649 ]                                              | 549 [ 500, 628 ]                                                | 0.86                         | 0.87                                        |
| Chao1    | 1146 [ 919, 1290 ]                                            | 1170 [ 971, 1419 ]                                              | 0.41                         | 0.68                                        |
| Shannon  | 3.77 [ 3.46, 3.95 ]                                           | 3.77 [ 3.57, 4.14 ]                                             | 0.38                         | 0.68                                        |
| Simpson  | 0.94 [ 0.90, 0.95 ]                                           | 0.94 [ 0.92, 0.96 ]                                             | 0.21                         | 0.68                                        |
| Fisher   | 128 [ 106, 156 ]                                              | 125 [ 111, 149 ]                                                | 0.87                         | 0.87                                        |

<sup>1)</sup> Compared low and high barley groups using Mann–Whitney *U*-test (crude *P* value)

<sup>2)</sup> Compared low and high barley groups using Mann–Whitney *U*-test adjusted with *FDR* method

**Supplemental Table 3** Relative abundance(%) of the frequent 50 microbiomes (genus levels), compared low barley with high barley group on cross-sectional study (aged 19-65 years in 2018, Japan).

| Genus                             | Low barley ( <i>n</i> 47)      |  | High barley ( <i>n</i> 47)     |  | <i>P</i> value <sup>1)</sup> | <i>P</i> <sub>FDR</sub> value <sup>2)</sup> |
|-----------------------------------|--------------------------------|--|--------------------------------|--|------------------------------|---------------------------------------------|
|                                   | range: 0-31.8 g/1000 kcal·d    |  | range: 32.3-253 g/1000 kcal·d  |  |                              |                                             |
|                                   | Median [ Interquartile range ] |  | Median [ Interquartile range ] |  |                              |                                             |
| <i>Bacteroides</i>                | 31.27 [ 0.01, 28.98 ]          |  | 29.28 [ 1.71, 27.52 ]          |  | 0.50                         | 0.79                                        |
| <i>Blautia</i>                    | 6.15 [ 0.78, 7.48 ]            |  | 5.81 [ 1.63, 6.67 ]            |  | 0.64                         | 0.85                                        |
| <i>Bifidobacterium</i>            | 2.73 [ 0.00, 5.10 ]            |  | 5.61 [ 0.00, 8.12 ]            |  | 0.01                         | 0.37                                        |
| <i>Faecalibacterium</i>           | 5.76 [ 0.00, 6.02 ]            |  | 6.08 [ 0.00, 6.34 ]            |  | 0.54                         | 0.79                                        |
| <i>Prevotella 9</i>               | 0.01 [ 0.00, 6.96 ]            |  | 0.00 [ 0.00, 3.90 ]            |  | 0.20                         | 0.59                                        |
| <i>Eubacterium rectale group</i>  | 1.10 [ 0.00, 2.28 ]            |  | 1.56 [ 0.00, 2.62 ]            |  | 0.73                         | 0.87                                        |
| <i>Parabacteroides</i>            | 2.28 [ 0.00, 2.62 ]            |  | 1.64 [ 0.00, 1.96 ]            |  | 0.18                         | 0.59                                        |
| <i>Subdoligranulum</i>            | 1.12 [ 0.00, 1.80 ]            |  | 1.83 [ 0.00, 2.32 ]            |  | 0.08                         | 0.44                                        |
| <i>Collinsella</i>                | 0.92 [ 0.00, 1.82 ]            |  | 1.95 [ 0.00, 2.20 ]            |  | 0.03                         | 0.42                                        |
| <i>Sutterella</i>                 | 1.41 [ 0.00, 1.82 ]            |  | 1.43 [ 0.00, 2.02 ]            |  | 0.99                         | 0.99                                        |
| <i>Megamonas</i>                  | 0.00 [ 0.00, 3.03 ]            |  | 0.00 [ 0.00, 0.76 ]            |  | 0.20                         | 0.59                                        |
| <i>Ruminococcus torques group</i> | 1.27 [ 0.03, 1.67 ]            |  | 1.09 [ 0.01, 1.73 ]            |  | 0.36                         | 0.72                                        |
| <i>Anaerostipes</i>               | 0.89 [ 0.02, 1.28 ]            |  | 1.06 [ 0.07, 1.92 ]            |  | 0.0502                       | 0.42                                        |
| <i>Lachnoclostridium</i>          | 1.22 [ 0.19, 1.69 ]            |  | 1.23 [ 0.04, 1.48 ]            |  | 0.53                         | 0.79                                        |
| <i>Fusicatenibacter</i>           | 1.41 [ 0.00, 1.49 ]            |  | 1.00 [ 0.00, 1.40 ]            |  | 0.83                         | 0.90                                        |
| <i>Fusobacterium</i>              | 0.00 [ 0.00, 1.14 ]            |  | 0.00 [ 0.00, 1.65 ]            |  | 0.91                         | 0.95                                        |
| <i>Eubacterium hallii group</i>   | 0.97 [ 0.00, 1.28 ]            |  | 0.78 [ 0.00, 0.97 ]            |  | 0.60                         | 0.83                                        |
| <i>Alistipes</i>                  | 0.21 [ 0.00, 0.82 ]            |  | 0.40 [ 0.00, 1.30 ]            |  | 0.34                         | 0.72                                        |
| <i>Lachnospira</i>                | 0.41 [ 0.00, 0.78 ]            |  | 0.62 [ 0.00, 1.10 ]            |  | 0.22                         | 0.59                                        |

|                                          |                     |                     |      |      |
|------------------------------------------|---------------------|---------------------|------|------|
| <i>Prevotella 2</i>                      | 0.00 [ 0.00, 0.34 ] | 0.00 [ 0.00, 1.46 ] | 0.99 | 0.99 |
| <i>Megasphaera</i>                       | 0.00 [ 0.00, 0.65 ] | 0.00 [ 0.00, 1.15 ] | 0.28 | 0.66 |
| <i>Roseburia</i>                         | 0.66 [ 0.00, 1.04 ] | 0.40 [ 0.00, 0.72 ] | 0.18 | 0.59 |
| <i>Veillonella</i>                       | 0.03 [ 0.00, 1.06 ] | 0.03 [ 0.00, 0.70 ] | 0.47 | 0.79 |
| <i>Phascolarctobacterium</i>             | 0.01 [ 0.00, 0.79 ] | 0.00 [ 0.00, 0.70 ] | 0.58 | 0.83 |
| <i>Escherichia Shigella</i>              | 0.07 [ 0.00, 0.72 ] | 0.05 [ 0.00, 0.75 ] | 0.73 | 0.87 |
| <i>Lachnospiraceae family uncultured</i> | 0.49 [ 0.01, 0.72 ] | 0.59 [ 0.00, 0.70 ] | 0.91 | 0.95 |
| <i>Alloprevotella</i>                    | 0.00 [ 0.00, 0.56 ] | 0.00 [ 0.00, 0.74 ] | 0.77 | 0.89 |
| <i>Dorea</i>                             | 0.40 [ 0.00, 0.81 ] | 0.35 [ 0.00, 0.43 ] | 0.32 | 0.72 |
| <i>Ruminococcus 2</i>                    | 0.00 [ 0.00, 0.37 ] | 0.01 [ 0.00, 0.86 ] | 0.04 | 0.42 |
| <i>Butyricicoccus</i>                    | 0.43 [ 0.00, 0.46 ] | 0.65 [ 0.12, 0.65 ] | 0.00 | 0.09 |
| <i>Lachnospiraceae UCG-008</i>           | 0.52 [ 0.00, 0.57 ] | 0.32 [ 0.00, 0.48 ] | 0.81 | 0.90 |
| <i>Ruminococcus 1</i>                    | 0.01 [ 0.00, 0.28 ] | 0.01 [ 0.00, 0.69 ] | 0.34 | 0.72 |
| <i>Acidaminococcus</i>                   | 0.00 [ 0.00, 0.30 ] | 0.03 [ 0.00, 0.66 ] | 0.07 | 0.44 |
| <i>Ruminococcaceae family uncultured</i> | 0.23 [ 0.00, 0.42 ] | 0.24 [ 0.00, 0.54 ] | 0.64 | 0.85 |
| <i>Parasutterella</i>                    | 0.02 [ 0.00, 0.38 ] | 0.02 [ 0.00, 0.57 ] | 0.50 | 0.79 |
| <i>Streptococcus</i>                     | 0.12 [ 0.00, 0.52 ] | 0.20 [ 0.00, 0.43 ] | 0.50 | 0.79 |
| <i>Mitsuokella</i>                       | 0.00 [ 0.00, 0.59 ] | 0.00 [ 0.00, 0.35 ] | 0.38 | 0.73 |
| <i>Prevotellaceae NK3B31 group</i>       | 0.00 [ 0.00, 0.48 ] | 0.00 [ 0.00, 0.28 ] | 0.71 | 0.87 |
| <i>Dialister</i>                         | 0.00 [ 0.00, 0.31 ] | 0.07 [ 0.00, 0.43 ] | 0.04 | 0.42 |
| <i>Ruminiclostridium 5</i>               | 0.12 [ 0.00, 0.36 ] | 0.15 [ 0.01, 0.32 ] | 0.66 | 0.85 |
| <i>Ruminococcaceae UCG-013</i>           | 0.09 [ 0.00, 0.27 ] | 0.22 [ 0.00, 0.34 ] | 0.06 | 0.44 |
| <i>Barnesiella</i>                       | 0.00 [ 0.00, 0.23 ] | 0.05 [ 0.00, 0.36 ] | 0.22 | 0.59 |
| <i>Ruminococcaceae UCG-002</i>           | 0.00 [ 0.00, 0.17 ] | 0.01 [ 0.00, 0.39 ] | 0.19 | 0.59 |

|                                            |                     |                     |      |      |
|--------------------------------------------|---------------------|---------------------|------|------|
| <i>Rhodospirillaceae family uncultured</i> | 0.00 [ 0.00, 0.26 ] | 0.00 [ 0.00, 0.27 ] | 0.43 | 0.79 |
| <i>Ruminococcus gauvreauii group</i>       | 0.00 [ 0.00, 0.23 ] | 0.00 [ 0.00, 0.25 ] | 0.79 | 0.90 |
| <i>Paraprevotella</i>                      | 0.00 [ 0.00, 0.31 ] | 0.00 [ 0.00, 0.17 ] | 0.20 | 0.59 |
| <i>Odoribacter</i>                         | 0.04 [ 0.00, 0.21 ] | 0.10 [ 0.00, 0.24 ] | 0.48 | 0.79 |
| <i>Eubacterium coprostanoligenes group</i> | 0.00 [ 0.00, 0.14 ] | 0.01 [ 0.00, 0.30 ] | 0.21 | 0.59 |
| <i>Bilophila</i>                           | 0.10 [ 0.00, 0.18 ] | 0.14 [ 0.00, 0.25 ] | 0.24 | 0.60 |
| <i>Tyzzereella 3</i>                       | 0.00 [ 0.00, 0.10 ] | 0.00 [ 0.00, 0.29 ] | 0.22 | 0.59 |

<sup>1)</sup> Compared low and high barley groups using Mann–Whitney *U*-test (crude *P* value)

<sup>2)</sup> Compared low and high barley groups using Mann–Whitney *U*-test adjusted with *FDR* method

**Supplemental Table 4** Results of Multiple regression analysis (dichotomy and continuous) and Kendall rank correlation between barley consumption rate (g/1000 kcal·day) and intestinal microbiota on cross-sectional study (aged 19-65 years in 2018, Japan).

| Genus                             | Multiple regression (Barley:dichotomy) <sup>1)</sup> |      |         | Multiple regression (Barley:continuous) <sup>2)</sup> |      |         | Kendall rank correlation <sup>3)</sup> |         |
|-----------------------------------|------------------------------------------------------|------|---------|-------------------------------------------------------|------|---------|----------------------------------------|---------|
|                                   | Estimate                                             | SE   | P value | Estimate                                              | SE   | P value | Estimate                               | P value |
| <i>Bacteroides</i>                | -1.51                                                | 3.15 | 0.63    | -0.06                                                 | 0.04 | 0.57    | -0.05                                  | 0.48    |
| <i>Blautia</i>                    | -0.85                                                | 0.85 | 0.32    | -0.02                                                 | 0.01 | 0.50    | -0.05                                  | 0.47    |
| <i>Bifidobacterium</i>            | 2.78                                                 | 1.63 | 0.09    | 0.11                                                  | 0.02 | 0.04    | 0.17                                   | 0.01    |
| <i>Faecalibacterium</i>           | -0.21                                                | 1.09 | 0.85    | -0.04                                                 | 0.01 | 0.23    | 0.07                                   | 0.32    |
| <i>Prevotella 9</i>               | -2.60                                                | 2.91 | 0.38    | -0.07                                                 | 0.03 | 0.44    | -0.09                                  | 0.27    |
| <i>Eubacterium rectale group</i>  | 0.55                                                 | 0.58 | 0.34    | 0.02                                                  | 0.01 | 0.37    | 0.02                                   | 0.80    |
| <i>Parabacteroides</i>            | -0.65                                                | 0.39 | 0.10    | -0.01                                                 | 0.00 | 0.35    | -0.11                                  | 0.12    |
| <i>Subdoligranulum</i>            | 0.43                                                 | 0.46 | 0.36    | -0.01                                                 | 0.01 | 0.57    | 0.06                                   | 0.38    |
| <i>Collinsella</i>                | 0.50                                                 | 0.52 | 0.34    | 0.02                                                  | 0.01 | 0.15    | 0.12                                   | 0.10    |
| <i>Sutterella</i>                 | 0.24                                                 | 0.44 | 0.59    | -0.01                                                 | 0.01 | 0.42    | -0.03                                  | 0.67    |
| <i>Megamonas</i>                  | -1.87                                                | 1.15 | 0.11    | -0.06                                                 | 0.01 | 0.13    | -0.11                                  | 0.19    |
| <i>Ruminococcus torques group</i> | 0.16                                                 | 0.41 | 0.70    | 0.00                                                  | 0.00 | 0.94    | -0.05                                  | 0.45    |
| <i>Anaerostipes</i>               | 0.71                                                 | 0.36 | 0.05    | 0.01                                                  | 0.00 | 0.36    | 0.08                                   | 0.25    |
| <i>Lachnoclostridium</i>          | -0.17                                                | 0.27 | 0.54    | 0.00                                                  | 0.00 | 0.96    | -0.04                                  | 0.54    |
| <i>Fusicatenibacter</i>           | -0.06                                                | 0.27 | 0.82    | -0.01                                                 | 0.00 | 0.46    | -0.02                                  | 0.80    |
| <i>Fusobacterium</i>              | 0.74                                                 | 0.85 | 0.39    | 0.01                                                  | 0.01 | 0.61    | -0.03                                  | 0.72    |
| <i>Eubacterium hallii group</i>   | -0.42                                                | 0.24 | 0.08    | -0.01                                                 | 0.00 | 0.50    | 0.00                                   | 0.98    |
| <i>Alistipes</i>                  | 0.29                                                 | 0.37 | 0.44    | 0.00                                                  | 0.00 | 1.00    | 0.05                                   | 0.44    |
| <i>Lachnospira</i>                | 0.23                                                 | 0.25 | 0.36    | 0.01                                                  | 0.00 | 0.26    | 0.16                                   | 0.03    |
| <i>Prevotella 2</i>               | 1.41                                                 | 0.64 | 0.03    | 0.01                                                  | 0.01 | 0.68    | -0.01                                  | 0.90    |
| <i>Megasphaera</i>                | 0.74                                                 | 0.60 | 0.22    | 0.08                                                  | 0.01 | 0.00    | 0.06                                   | 0.43    |
| <i>Roseburia</i>                  | -0.40                                                | 0.22 | 0.08    | -0.01                                                 | 0.00 | 0.16    | -0.07                                  | 0.32    |
| <i>Veillonella</i>                | -0.37                                                | 0.44 | 0.40    | 0.00                                                  | 0.01 | 0.86    | 0.14                                   | 0.07    |



|                                            |       |      |      |       |      |      |       |      |
|--------------------------------------------|-------|------|------|-------|------|------|-------|------|
| <i>Phascolarctobacterium</i>               | -0.19 | 0.22 | 0.39 | 0.00  | 0.00 | 0.66 | 0.00  | 0.96 |
| <i>Escherichia Shigella</i>                | 0.06  | 0.47 | 0.90 | 0.02  | 0.01 | 0.26 | 0.03  | 0.69 |
| <i>Lachnospiraceae family uncultured</i>   | 0.02  | 0.14 | 0.90 | 0.01  | 0.00 | 0.01 | 0.07  | 0.31 |
| <i>Alloprevotella</i>                      | 0.18  | 0.56 | 0.75 | -0.01 | 0.01 | 0.56 | -0.06 | 0.49 |
| <i>Dorea</i>                               | -0.32 | 0.19 | 0.10 | -0.01 | 0.00 | 0.39 | -0.06 | 0.36 |
| <i>Ruminococcus 2</i>                      | 0.45  | 0.23 | 0.06 | 0.00  | 0.00 | 0.51 | 0.15  | 0.05 |
| <i>Butyricicoccus</i>                      | 0.17  | 0.07 | 0.02 | 0.00  | 0.00 | 0.05 | 0.21  | 0.00 |
| <i>Lachnospiraceae UCG-008</i>             | -0.11 | 0.11 | 0.32 | 0.00  | 0.00 | 0.60 | 0.01  | 0.93 |
| <i>Ruminococcus 1</i>                      | 0.36  | 0.21 | 0.08 | 0.01  | 0.00 | 0.18 | 0.10  | 0.20 |
| <i>Acidaminococcus</i>                     | 0.37  | 0.20 | 0.07 | 0.00  | 0.00 | 0.82 | 0.08  | 0.29 |
| <i>Ruminococcaceae family uncultured</i>   | 0.03  | 0.13 | 0.81 | 0.01  | 0.00 | 0.15 | 0.01  | 0.85 |
| <i>Parasutterella</i>                      | 0.18  | 0.20 | 0.38 | 0.02  | 0.00 | 0.01 | 0.08  | 0.27 |
| <i>Streptococcus</i>                       | -0.11 | 0.17 | 0.53 | 0.00  | 0.00 | 0.79 | 0.07  | 0.32 |
| <i>Mitsuokella</i>                         | -0.21 | 0.45 | 0.65 | 0.00  | 0.01 | 0.93 | 0.02  | 0.84 |
| <i>Prevotellaceae NK3B31 group</i>         | -0.34 | 0.41 | 0.41 | -0.01 | 0.00 | 0.53 | 0.00  | 0.99 |
| <i>Dialister</i>                           | 0.17  | 0.13 | 0.19 | 0.00  | 0.00 | 0.92 | 0.08  | 0.27 |
| <i>Ruminiclostridium 5</i>                 | -0.04 | 0.11 | 0.72 | 0.00  | 0.00 | 0.95 | 0.01  | 0.89 |
| <i>Ruminococcaceae UCG-013</i>             | 0.06  | 0.08 | 0.49 | 0.00  | 0.00 | 0.27 | 0.17  | 0.02 |
| <i>Barnesiella</i>                         | 0.09  | 0.12 | 0.46 | 0.00  | 0.00 | 0.63 | 0.08  | 0.29 |
| <i>Ruminococcaceae UCG-002</i>             | 0.14  | 0.13 | 0.25 | 0.00  | 0.00 | 0.98 | 0.07  | 0.38 |
| <i>Rhodospirillaceae family uncultured</i> | 0.02  | 0.21 | 0.92 | 0.00  | 0.00 | 0.64 | -0.09 | 0.25 |
| <i>Ruminococcus gausvreauii group</i>      | 0.01  | 0.11 | 0.93 | 0.00  | 0.00 | 0.38 | -0.01 | 0.93 |
| <i>Paraprevotella</i>                      | -0.15 | 0.13 | 0.23 | 0.00  | 0.00 | 0.86 | -0.13 | 0.11 |
| <i>Odoribacter</i>                         | 0.01  | 0.08 | 0.87 | 0.00  | 0.00 | 0.88 | 0.02  | 0.76 |
| <i>Eubacterium coprostanoligenes group</i> | 0.13  | 0.10 | 0.21 | 0.01  | 0.00 | 0.03 | 0.07  | 0.38 |
| <i>Bilophila</i>                           | 0.05  | 0.05 | 0.29 | 0.00  | 0.00 | 0.46 | 0.06  | 0.40 |
| <i>Tyzzereella 3</i>                       | 0.19  | 0.13 | 0.16 | 0.02  | 0.00 | 0.00 | 0.16  | 0.04 |

---

- 1) Results of multiple regression analysis. Genus levels of microbiome relative abundance (%) were used as the dependent variable, barley consumption rate (0="Low barley group", 1="High barley group"), age (years), and sex (0="female", 1="male") were used as the independent variable. Estimate: Linear regression coefficient, SE: standard error.
- 2) Results of multiple regression analysis. Genus levels of microbiome relative abundance (%) were used as the dependent variable, barley consumption rate (g/1000 kcal·day), age (years), and sex (0="female", 1="male") were used as the independent variable. Estimate: Linear regression coefficient, SE: standard error.
- 3) Results of correlation test between barley consumption rate (g/1000 kcal·day) and genus levels of intestinal microbiota relative abundance (%) using Kendall method. Estimate: Kendall's correlation coefficient.

**Supplemental Table 5** Cross-sectional relationship between barley intake group (Low = 0, High = 1) and microbiomes (*Butyricoccus*, *Bifidobacterium*, *Ruminococcus 2*, and *Anaerostipes*) using multiple regression model (aged 19-65 years in 2018, Japan).

| Independent variable (unit)      | Dependent variable  |                        |                       |                     |
|----------------------------------|---------------------|------------------------|-----------------------|---------------------|
|                                  | <i>Butyricoccus</i> | <i>Bifidobacterium</i> | <i>Ruminococcus 2</i> | <i>Anaerostipes</i> |
| <b>Model 1</b>                   |                     |                        |                       |                     |
| Barley group (Low = 0, High = 1) | 0.165 (0.077) *     | 3.253 (1.727) †        | 0.527 (0.246) *       | 0.594 (0.377)       |
| Sex (Female =0, Male = 1)        | -0.061 (0.075)      | -1.238 (1.691)         | -0.23 (0.241)         | 0.328 (0.369)       |
| Age (10 years)                   | -0.026 (0.034)      | 0.909 (0.768)          | 0.011 (0.109)         | -0.153 (0.167)      |
| Dietary fiber (g/1000 kcal)      | 0.008 (0.024)       | -0.454 (0.546)         | -0.073 (0.078)        | 0.110 (0.119)       |
| <b>Model 2</b>                   |                     |                        |                       |                     |
| Barley group (Low = 0, High = 1) | 0.173 (0.075) *     | 2.321 (1.682)          | 0.601 (0.233) *       | 0.645 (0.369) †     |
| Sex (Female =0, Male = 1)        | -0.066 (0.074)      | -1.200 (1.664)         | -0.095 (0.231)        | 0.218 (0.365)       |
| Age (10 years)                   | -0.025 (0.036)      | 1.174 (0.819)          | -0.105 (0.113)        | -0.094 (0.179)      |
| Cereal (g/1000 kcal)             | 0.000 (0.001)       | 0.017 (0.015)          | -0.005 (0.002) *      | 0.002 (0.003)       |
| <b>Model 3</b>                   |                     |                        |                       |                     |
| Barley group (Low = 0, High = 1) | 0.165 (0.073) *     | 2.621 (1.663)          | 0.503 (0.236) *       | 0.675 (0.363) †     |
| Sex (Female =0, Male = 1)        | -0.063 (0.073)      | -0.880 (1.657)         | -0.198 (0.235)        | 0.265 (0.362)       |
| Age (10 years)                   | -0.029 (0.035)      | 0.764 (0.781)          | 0.028 (0.111)         | -0.155 (0.171)      |
| Legumes (g/1000 kcal)            | 0.001 (0.002)       | 0.025 (0.046)          | -0.008 (0.006)        | 0.005 (0.010)       |
| <b>Model 4</b>                   |                     |                        |                       |                     |
| Barley group (Low = 0, High = 1) | 0.150 (0.077) †     | 2.259 (1.732)          | 0.487 (0.248) †       | 0.712 (0.380) †     |
| Sex (Female =0, Male = 1)        | -0.060 (0.073)      | -0.809 (1.656)         | -0.189 (0.237)        | 0.253 (0.363)       |
| Age (10 years)                   | -0.030 (0.034)      | 0.723 (0.776)          | 0.009 (0.111)         | -0.138 (0.170)      |
| <i>Natto</i> (g/1000 kcal)       | 0.004 (0.004)       | 0.082 (0.091)          | -0.006 (0.013)        | -0.001 (0.020)      |

Following characters mean significant differences. †: $P < 0.1$ , \*: $P < 0.05$

Results of multiple regression analysis. Genus levels of microbiome relative abundance (%) were used as the dependent variable.

Barley consumption rate (0="Low barley group", 1="High barley group"), age (years), sex (0="female", 1="male"), and dietary factor (dietary fiber, cereal, legumes, *natto*, g/1000 kcal) were used as the independent variable.

Data are Linear regression coefficient and standard error.

**Supplemental Table 6** Correlation test between barley intake and dietary custom on cross-sectional study (aged 19-65 years in 2018, Japan).

| Variable                                    | Estimate | <i>P</i> value |
|---------------------------------------------|----------|----------------|
| Healthy diet and nutrients                  |          |                |
| Dietary fibre (g/1000 kcal·d)               | 0.31     | <0.001         |
| Legumes (g/1000 kcal·d)                     | 0.15     | 0.03           |
| Polyunsaturated fatty acids (g/1000 kcal·d) | 0.14     | 0.051          |
| Omega-3 fatty acids (g/1000 kcal·d)         | 0.10     | 0.15           |
| Green vegetables (g/1000 kcal·d)            | 0.07     | 0.32           |
| Calcium (mg/1000 kcal·d)                    | 0.06     | 0.41           |
| Fruits (g/1000 kcal·d)                      | -0.01    | 0.92           |
| Milk (g/1000 kcal·d)                        | -0.06    | 0.40           |
| Unhealthy diet and nutrients                |          |                |
| Red meat (g/1000 kcal·d)                    | -0.01    | 0.94           |
| Sodium (mg/1000 kcal·d)                     | -0.07    | 0.35           |
| Sugar-sweetened beverages (g/1000 kcal·d)   | -0.10    | 0.14           |

Kendall rank correlation between barley intake (kcal/1000 kcal·d) and diet or nutrients (weight /1000 kcal·d)

Vegetables: green vegetables

Milk: include yoghurt
